# Supplementary material for: Outcomes of immunosuppressive therapy in chronic hypersensitivity pneumonitis
Source: PubMed Central journal article supplement — ERJ Open Res. 2017 Aug 17;3(3):00016-2017. doi: 10.1183/23120541.00016-2017 (PMC5570511; doi:10.1183/23120541.00016-2017), 2017-08-17
Supplement: 00016-2017_supplementary_tables.pdf [file 00016-2017_supplementary_tables.pdf]

Table S1. Baseline Characteristics of HP cohort On Immunosuppression

| Characteristics                            | Prednisone<br>(n=41) | Azathioprine<br>(n=20) | Mycophenolate<br>(n=32) | p-value |
|--------------------------------------------|----------------------|------------------------|-------------------------|---------|
| Age, mean ( $\pm$ SD)                      | 62.3 (12.8)          | 55.9 (13.5)            | 62.8 (8.4)              | 0.080   |
| Female gender, n (%)                       | 29 (70.7)            | 14 (80)                | 16 (50)                 | 0.149   |
| Race/Ethnicity                             |                      |                        |                         |         |
| Caucasian, n (%)                           | 34 (82.9)            | 16 (80.0)              | 30 (93.8)               | 0.284   |
| BMI, mean ( $\pm$ SD)                      | 31.9 (9.8)           | 35 (10.4)              | 32.1 (7.2)              | 0.431   |
| Ever smoker, n (%)                         | 24 (58.5)            | 11 (55)                | 19 (59.4)               | 0.950   |
| Antigen exposure                           |                      |                        |                         |         |
| Avian, n (%)                               | 19 (46.3)            | 10 (50.0)              | 13 (40.6)               | 0.787   |
| Mold, n (%)                                | 10 (24.4)            | 4 (20.0)               | 14 (43.8)               | 0.109   |
| Hot tub, n (%)                             | 2 (4.9)              | 0 (0.0)                | 0 (0.0)                 | 0.274   |
| Unknown, n (%)                             | 14 (34.1)            | 6 (30.0)               | 9 (28.1)                | 0.852   |
| Gastroesophageal reflux, n (%)             | 25 (61.0)            | 14 (70.0)              | 19 (59.4)               | 0.722   |
| Crackles, n (%)                            | 35 (85.4)            | 19 (95.0)              | 31 (96.9)               | 0.178   |
| Clubbing, n (%)                            | 8 (19.5)             | 6 (30.0)               | 12 (37.5)               | 0.230   |
| TLC <sup>`</sup> (% predicted) ( $\pm$ SD) | 72.6 (17.4)          | 65.2 (18.1)            | 66.9 (15.3)             | 0.208   |
| FVC <sup>@</sup> (% predicted) ( $\pm$ SD) | 61.4 (19.3)          | 56.7 (14.6)            | 60.2 (16.3)             | 0.627   |
| DLCO (% predicted) ( $\pm$ SD)             | 48.5 (20.3)          | 47.2 (22.7)            | 45.6 (24.0)             | 0.853   |
| Oxygen therapy, n (%)                      | 28 (68.3)            | 15 (75.0)              | 23 (71.9)               | 0.855   |
| HRCT features                              |                      |                        |                         |         |
| HRCT fibrosis score, mean ( $\pm$ SD)      | 127.2 (19.1)         | 120.8 (14.0)           | 127.3 (18.8)            | 0.367   |
| Mosaic attenuation, n (%)                  | 36 (87.8)            | 18 (90.0)              | 27 (84.4)               | 0.827   |
| Ground glass opacities, n (%)              | 35 (85.4)            | 20 (100.0)             | 31 (96.9)               | 0.064   |
| Honeycombing, n (%)                        | 21 (51.2)            | 7 (35.0)               | 14 (43.8)               | 0.480   |
| Histopathologic features**                 |                      |                        |                         |         |
| Surgical lung biopsy obtained, n (%)       | 23 (56.1)            | 17 (85.0)              | 22 (68.8)               | 0.076   |
| Poorly formed granulomas, n (%)            | 18 (43.9)            | 8 (40.0)               | 15 (46.9)               | 0.116   |
| Honeycombing with UIP pattern, n (%)       | 9 (22.0)             | 11 (55.0)              | 9 (28.1)                | 0.219   |
| Mean follow-up time, months ( $\pm$ SD)    | 34 (28)              | 42 (32)                | 40 (22)                 | 0.582   |

HP = Hypersensitivity Pneumonitis; IS = Immunosuppressive therapy (Prednisone, Azathioprine, Mycophenolate mofetil); <sup>`</sup>n=127;

<sup>@</sup>n=130; HRCT= High-resolution computerized tomography scan. P-value depicts level of significance for comparison between means of the prednisone, azathioprine and mycophenolate groups using the one-way analysis of variance (ANOVA) test.

Table S2. Dose and duration of prednisone therapy

| Treatment                            | Prednisone<br>(n=41) | Aza<br>(n=20) | MMF<br>(n=32) | p-value      |
|--------------------------------------|----------------------|---------------|---------------|--------------|
| Median                               |                      |               |               |              |
| Prednisone dose (range), mg          | 40 (10 - 60)         | 40 (5 - 60)   | 20 (5 - 60)   | <b>0.021</b> |
| Duration of treatment (range), weeks | 11 (4 - 156)         | 8 (5 - 52)    | 9 (4 - 56)    | 0.280        |
| Mean                                 |                      |               |               |              |
| Prednisone dose (SD), mg             | 35.3 (16.0)          | 31.5 (13.4)   | 23.9 (14.0)   | <b>0.013</b> |
| Duration of treatment (SD), weeks    | 18.8 (26.9)          | 15.1 (15.8)   | 17.1(15.7)    | 0.834        |

Abbreviations: ILD = Interstitial Lung Disease; MMF = mycophenolate mofetil; Aza = azathioprine

\*Values depicted represent the maximum dose administered as chronic therapy

Table S3. Grades of Treatment Emergent Adverse Events (TEAE) substratified by Immunosuppressive Therapy\* administered

| Therapy                                                                                     | TEAE Count | TEAE Grade |
|---------------------------------------------------------------------------------------------|------------|------------|
| <b>Mycophenolate mofetil (MMF)</b>                                                          |            |            |
| Constipation                                                                                | 0          | I          |
| Nausea                                                                                      | 0          | I          |
| Vomiting                                                                                    | 0          | II         |
| Headache/dizziness/blurry vision                                                            | 5          | I          |
| Diarrhea                                                                                    | 2          | II         |
| Stomach upset/pain/gas                                                                      | 8          | II         |
| Edema                                                                                       | 4          | II         |
| Htn                                                                                         | 0          | I          |
| Fever                                                                                       | 1          | II         |
| Tremor                                                                                      | 2          | I          |
| Insomnia                                                                                    | 2          | I          |
| Bruising/cellulitis?                                                                        | 3          | II         |
| Recurrent UTIs                                                                              | 3          | III        |
| Respiratory hospitalization                                                                 | 4          | IV         |
| <b>Azathioprine (AZA)</b>                                                                   |            |            |
| Nausea/anorexia                                                                             | 2          | I          |
| Vomiting                                                                                    | 1          | II         |
| Diarrhea                                                                                    | 0          | II         |
| Mild ALT, AST elevated (medication continued)/jaundice/itching/hepatotoxicity               | 2          | I          |
| ALT, AST elevated with immediate cessation of drug                                          | 2          | II         |
| ALT, AST elevated (medication discontinued; patient hospitalized)/hepatic veno-occlusive dx | 2          | III        |
| Fever + malaise/myalgia/night-sweats                                                        | 6          | II         |
| Rash/hair loss                                                                              | 3          | I          |
| Leukopenia/thrombocytopenia/anemia/myelosuppression/easy bruising or bleeding               | 6          | I          |
| Immunosuppression/upper respiratory infection/thrush                                        | 4          | II         |
| Immunosuppression/recurrent UTI/fungal esophagitis                                          | 2          | III        |
| Progressive multifocal leukoencephalopathy                                                  | 0          | IV         |
| Gastrointestinal hypersensitivity rxn                                                       | 0          | III        |
| Pancreatitis                                                                                | 0          | III        |
| Lymphoma/malignancy                                                                         | 0          | IV         |
| Acute febrile neutrophilic dermatosis                                                       | 0          | II         |
| Edema/weight gain                                                                           | 10         | II         |
| Thrush                                                                                      | 1          | II         |

|                                                                   |    |     |
|-------------------------------------------------------------------|----|-----|
| Belching/bloating/GERD/dyspepsia                                  | 3  | II  |
| Moon facies                                                       | 1  | I   |
| Respiratory hospitalization                                       | 5  | IV  |
| <b>Prednisone</b>                                                 |    |     |
| Appetite changes                                                  | 2  | I   |
| Nausea/vomiting                                                   | 1  | I   |
| Hypokalemia                                                       | 0  | I   |
| Headache/dizziness/blurry vision                                  | 6  | I   |
| Glucose intolerance                                               | 7  | II  |
| Stomach upset/pain/ gas/dyspepsia                                 | 10 | II  |
| Edema/weight gain                                                 | 24 | II  |
| Hypertension                                                      | 3  | I   |
| Fever/diaphoresis                                                 | 2  | II  |
| Tremor                                                            | 3  | I   |
| Insomnia                                                          | 6  | I   |
| Petechiae/bruising/cellulitis/skin atrophy/impaired wound healing | 3  | II  |
| Facial erythema/skin pigmentation/hair loss/acne/rash/urticaria   | 2  | I   |
| Emotional lability/anxiety/depression                             | 9  | II  |
| Raised IOP                                                        | 0  | I   |
| Cushings syndrome/moon facies/hirsutism/ menstrual irregularities | 1  | I   |
| Muscle atrophy/deconditioning/proximal myopathy                   | 8  | II  |
| Osteopenia/osteoporosis                                           | 5  | I   |
| Cataracts/glaucoma                                                | 2  | III |
| Upper respiratory infection/thrush                                | 7  | II  |
| Recurrent urinary tract infection/Fungal esophagitis              | 2  | III |
| Respiratory hospitalization                                       | 6  | IV  |

\***MMF** - Constipation, nausea, vomiting, headache, dizziness, blurry vision, diarrhea, stomach upset/pain, gas/bloating/dyspepsia, edema, HTN, fever, tremors, insomnia, petechiae/bruising, cellulitis, recurrent urinary tract infections, lower respiratory tract infections.

\***Azathioprine**: Constipation, nausea, vomiting, headache, dizziness, blurry vision, diarrhea, stomach upset/pain, gas/bloating/dyspepsia, edema, HTN, fever, tremors, insomnia, petechiae/bruising, cellulitis, recurrent urinary tract infections, lower respiratory tract infections, liver function test abnormalities, rash, leukopenia, thrombocytopenia, anemia, myelosuppression, progressive multifocal leukoencephalopathy, pancreatitis, lymphoma, malignancy, acute febrile neutrophilic dermatosis, myalgia.

\***Prednisone**: appetite changes, nausea, vomiting, hypokalemia, headache, dizziness, blurry vision, glucose intolerance, stomach upset/pain, gas/dyspepsia, edema, sodium retention, hypertension, fever, diaphoresis, tremors, insomnia, petechiae/bruising, cellulitis, skin atrophy, impaired wound healing, facial erythema, skin pigmentation, hair loss, acne, rash, urticaria, emotional lability, anxiety, depression, raised IOP, Cushings syndrome/moon facies, hirsutism, menstrual irregularities, muscle atrophy/deconditioning/proximal myopathy, osteopenia/osteoporosis, cataracts, glaucoma, thrush, recurrent urinary tract infections, LRTIs.

Table S4. Variables Predicting Survival in Patients with CHP

| Variable                         | Unadjusted (n=131) |                  |              | Adjusted* (n=115) |              |              |
|----------------------------------|--------------------|------------------|--------------|-------------------|--------------|--------------|
|                                  | HR                 | p-value          | 95% CI       | HR                | p-value      | 95% CI       |
| Immunosuppressive therapy        | 4.95               | <b>0.008</b>     | 1.51 - 16.20 | 5.37              | <b>0.040</b> | 1.08 - 26.67 |
| Age                              | 1.03               | 0.141            | 0.99 - 1.06  | 1.04              | 0.083        | 0.99 - 1.09  |
| Male gender                      | 1.14               | 0.704            | 0.58 - 2.24  | 1.48              | 0.351        | 0.65 - 3.41  |
| Identified environmental antigen | 1.53               | 0.217            | 0.78 - 3.01  | 1.57              | 0.269        | 0.71 - 3.48  |
| FVC                              | 0.95               | <b>&lt;0.001</b> | 0.93 - 0.97  | 0.98              | 0.295        | 0.95 - 1.01  |
| DLCO                             | 0.97               | <b>0.006</b>     | 0.96 - 0.99  | 1.00              | 0.921        | 0.97 - 1.02  |
| Caucasian race/ethnicity         | 8.60               | <b>0.034</b>     | 1.17 - 62.93 | --                | --           | --           |

\*Adjusted for age, gender, race, FVC (% predicted), DLCO (% predicted), and identified antigen. CHP=chronic hypersensitivity pneumonitis

Table S5. Other Baseline Characteristics of External CHP cohort On Immunosuppression

| Characteristics                            | Prednisone  | Azathioprine | Mycophenolate | p-value |
|--------------------------------------------|-------------|--------------|---------------|---------|
| <b>National Jewish Health</b>              |             |              |               |         |
| Age, mean ( $\pm$ SD)                      | 56.5 (13.9) | 58.9 (10.2)  | 61.3 (9.6)    | 0.600   |
| Female gender, n (%)                       | 40 (54.8)   | 4 (21.0)     | 3 (42.8)      | 0.030   |
| DLCO (% predicted) ( $\pm$ SD)             | 62.4 (18.7) | 48.4 (15.4)  | 46.3 (12.9)   | 0.010   |
| Identified antigen, n (%)                  | 33 (45.2)   | 10 (52.6)    | 2 (28.6)      | 0.530   |
| <b>University of Kansas Medical Center</b> |             |              |               |         |
| Age, mean ( $\pm$ SD)                      | 70.5 (8.1)  | 55.9 (13.5)  | 62.8 (8.4)    | <0.001  |
| Female gender, n (%)                       | 15 (50.0)   | 8 (61.5)     | 8 (47.1)      | 0.749   |
| DLCO (% predicted) ( $\pm$ SD)             | 53.0 (13.1) | 55.4 (18.5)  | 57.1 (19.6)   | 0.701   |
| Identified antigen, n (%)                  | 27 (90.0)   | 13 (100.0)   | 15 (88.2)     | 0.589   |
| <b>Columbia University Medical Center</b>  |             |              |               |         |
| Age, mean ( $\pm$ SD)                      | 55.0 (14.0) | --           | 60.0 (5.0)    | 0.338   |
| Female gender, n (%)                       | 3 (50.0)    | --           | 5 (55.0)      | 0.999   |
| DLCO (% predicted) ( $\pm$ SD)             | 60.8 (20.4) | --           | 41.4 (14.0)   | 0.155   |
| Identified antigen, n (%)                  | 5 (83.3)    | --           | 6 (66.7)      | 0.604   |
| <b>University of California Davis</b>      |             |              |               |         |
| Age, mean ( $\pm$ SD)                      | 74 (13.0)   | 75 (0.0)     | 77 (6.0)      | 0.898   |
| Female gender, n (%)                       | 2 (20.0)    | 0 (0.0)      | 3 (30.0)      | 0.549   |
| DLCO (% predicted) ( $\pm$ SD)             | 55 (22.0)   | 16 (0.0)     | 44 (18.0)     | 0.271   |
| Identified antigen, n (%)                  | 3 (75)      | 1 (100)      | 3 (60)        | 0.700   |

CHP = Chronic Hypersensitivity Pneumonitis; National Jewish Hospital - Prednisone, n=73; Azathioprine, n=19; Mycophenolate mofetil, n=7; University of Kansas Medical Center - Prednisone, n=30; Azathioprine, n=13; Mycophenolate mofetil, n=17; Columbia University Medical Center - Prednisone, n=6; Azathioprine, n=0; Mycophenolate mofetil, n=9; University of California Davis - Prednisone, n=4; Azathioprine, n=1; Mycophenolate mofetil, n=5
